1 **Increased Epstein-Barr virus C-promoter activity with CTCF-binding site deletion is associated**  
2 **with elevated EBNA2 recruitment.**

3

4 Ian J Groves<sup>1#\*</sup> & Martin J Allday<sup>1</sup>

5

6 <sup>1</sup>Section of Virology, Department of Medicine, Imperial College London, St Mary's Campus, London,

7 UK

8 <sup>#</sup>Current address: Department of Medicine, University of Cambridge, Box 157, Level 5, Cambridge

9 Biomedical Campus, Cambridge, CB2 0QQ, UK

10

11 \*Corresponding author: [ijg25@cam.ac.uk](mailto:ijg25@cam.ac.uk)

12

13 Running title: CTCF association regulates EBV C-promoter.

14

15

16

17

18

19

20

21

22

23

24

25

26

27

28

29 **Abstract**

30 The regulation of transcription from Epstein-Barr virus promoters is known to involve the association  
31 of the host CCCTC-binding factor (CTCF) protein. This control involves direct binding of CTCF across  
32 the EBV genome and the formation of three-dimensional loops between virus promoters and enhancers.  
33 We sought to address how the deletion of a CTCF binding site upstream of the C-promoter (Cp) affected  
34 viral transcription in infected lymphoblastoid cell lines (LCLs) and how binding of the EBV trans-  
35 activating protein EBNA2 was changed across this promoter. Transcript level from Cp was up-regulated  
36 with CTCF binding site deletion, and transcription from other promoters (Wp and Qp) was decreased,  
37 while transcript levels were largely unchanged by independent mutation of a Cp-RBPJ $\kappa$  binding site.  
38 In turn, expression of EBNA2 protein was also increased, likely driven by increases in polycistronic  
39 EBNA2-encoding transcripts. Finally, Cp up-regulation was associated with an 8-fold increase in  
40 EBNA2 enrichment across Cp, concomitant with increased association of the associated cellular factor  
41 RBPJ $\kappa$ , probably due to a more accessible three-dimensional chromatin conformation upstream of Cp.  
42 Overall, the data presented here confirm that binding of CTCF directly upstream of Cp is important for  
43 the regulation of transcription from this and other EBV promoters.

44

45

46

47

48

49

50

51

52

53

54

55

56

57 **Introduction**

58 Epstein-Barr virus (EBV) is a member of the human gammaherpesvirus family and is commonly known  
59 for its association with infectious mononucleosis/glandular fever. However, EBV is also closely linked  
60 with as many as 1.5% of all human cancers including B-cell lymphomas and epithelial malignancies,  
61 such as Burkitt's (BL) and Hodgkin's lymphomas (HL) and nasopharyngeal carcinoma (NPC),  
62 respectively (Plummer, 2016; Farrell, 2018). The association of EBV with different diseases is  
63 characterised by distinct transcription profiles of EBV nuclear antigens (EBNAs) and latent membrane  
64 proteins (LMPs) in conjunction with the differentiation status of the infected B-cell. Latency type I,  
65 mostly associated with BL and proliferating infected memory B-cells, involves transcription from the  
66 Q-promoter (Qp) of EBNA1, a DNA binding protein that is able to tether the viral episome to cellular  
67 chromosomes, thereby maintaining the EBV genome in dividing cells (Westhoff Smith, 2013). In  
68 contrast, latency type II is associated with expression of LMP1 and LMP2 as well as Qp-driven EBNA1.  
69 Finally, latency type III (also known as the 'growth' program) comprises expression of the LMPs as  
70 well as EBNA1, 2, 3A-C and -LP via alternatively spliced polycistronic transcripts driven initially from  
71 the W-promoter (Wp), and subsequently from the C-promoter (Cp) (Rowe, 1987), partly due to EBNA2  
72 recruitment (Woisetschlaeger, 1991; Altmann, 2006).

73

74 Programs of transcription during latency are driven from separate viral promoters on the EBV genome  
75 and are known to be regulated, at least in part, through modification of chromatin on the viral genome  
76 (Tempera, 2014; Hammerschmidt, 2015). The activity of Cp is also controlled by interaction with the  
77 'plasmid origin of replication' (OriP), which acts as an enhancer (Reisman, 1986; Altmann, 2006;  
78 Puglielli, 2006). EBNA2 association further allows the recruitment and stimulation of RNA polymerase  
79 II (RNAPII) at Cp (Bark-Jones, 2006; Palermo, 2008). Recruitment of EBNA2 to Cp is thought to be,  
80 at least in part, directed by the presence of a binding site for RBPJ $\kappa$ , a host protein that binds to EBNA2  
81 and co-localises with most EBNA2 binding sites on the genome (Ling, 1993; Zhao, 2011).

82

83 Interestingly, a host protein known as CCCTC-binding factor (CTCF) has been shown to be important  
84 in the regulation of gene expression of a number of human DNA viruses (Pentland, 2015) and is also

## CTCF association regulates EBV C-promoter

85 able to bind to several locations on the EBV episome, including a latency III-specific site between OriP  
86 and Cp (Tempera, 2010). CTCF, a host genomic architectural protein, was first shown to bind upstream  
87 of Cp by DNA affinity pulldown, electrophoretic mobility shift assay (EMSA), DNaseI footprinting  
88 assay and chromatin immunoprecipitation (ChIP) assay (Chau 2004; Chau, 2006; Tempera, 2010;  
89 Lupey-Green, 2018). This has more recently been confirmed by ChIP-seq (Holdorf, 2011; Lupey-  
90 Green, 2018) and has led to our understanding of its importance in the regulation of Cp activity both in  
91 latency type I and type III. Initial findings suggested that CTCF was acting as a boundary element,  
92 controlling transcription from Cp (Chau, 2004). However, further investigation has shown the necessity  
93 for other CTCF binding sites to be present in the EBV genome to form chromatin loops between the  
94 OriP enhancer element and both Cp and Qp (Tempera, 2011). Hence, the multi-factorial manner by  
95 which EBV Cp transcription is controlled throughout infection is still not fully understood. We took  
96 advantage of cell lines that had previously been produced via infection with recombinant EBV in which  
97 Cp had been genetically modified (Evans, 1996) to further investigate this regulation.

98

99 Isolation of *in vivo* EBV-infected B-cells from peripheral blood usually allows their culture *in vitro* as  
100 lymphoblastoid cell lines (LCLs). Alternatively, this process can also be performed directly *in vitro*  
101 through EBV infection of isolated B-cells in the laboratory. These LCLs normally express EBV proteins  
102 consistent with latency type III and, with this in mind, the previous authors (Evans, 1996) sought to  
103 investigate the association of both the RBPJ $\kappa$  binding site and also glucocorticoid response elements  
104 (GREs) present between OriP and Cp. Assessment of these two sites was done independently by either  
105 deletion of the GRE region (262bp at B95-8 coordinates 10221-10482) or mutation of the RBPJ $\kappa$   
106 binding site (GTGGGAAA to GTGAATTC at B95-8 coordinates 10959 -10966). Deletion of the GRE  
107 region gave rise to up-regulation in Cp transcript level, whereas RBPJ $\kappa$  binding site mutation resulted  
108 in a modest decrease in Cp activity (Evans, 1996). Unintentionally, the deletion that removed the GREs  
109 from Cp overlaps with the now known CTCF binding site in Cp (ranging between coordinates 10401-  
110 10594 by various methods) (Chau, 2006) (Figure 1). We were therefore able to use these cell lines to  
111 investigate whether the deletion of such an intrinsic CTCF binding site upstream of Cp gave rise to

## CTCF association regulates EBV C-promoter

112 changes in transcript levels associated with additional EBV promoters and whether the recruitment of  
113 transcription factors such as EBNA2 was altered in any way.

114

### 115 **Results**

116 We first tested the previous publication's observations (Evans, 1996) of how Cp transcript levels were  
117 affected by the deletions shown in Figure 1, before assessing whether these deletions affected  
118 transcription from the alternative EBV latency-associated promoters Wp and Qp. Using qPCR we show  
119 that, relative to transcription from a wild-type B95-8 EBV infection (Figure 2A, blue bar), LCLs  
120 infected with the GRE deleted/Cp-CTCF binding site deletion ( $\Delta$ CTCFbs) virus have over 5-fold  
121 greater level of transcript from Cp (Figure 2A, red bar), while only ~25% of usual Wp transcript level  
122 is present (Figure 2B, red bar). Although not statistically significant, transcription from Qp was also  
123 reduced to ~20% of wild-type level from the  $\Delta$ CTCFbs virus (Figure 2C, red bar). In contrast, although  
124 the level of transcription from all promoters tested here varies somewhat from the Cp-RBPJ $\kappa$  binding  
125 site mutant (RBPmut) virus in LCLs (Figure 2), none of the changes are statistically significantly  
126 different than the wild-type virus level.

127

128 Since deletion of the CTCF binding site in Cp had caused increased transcription from Cp itself, but a  
129 decrease from Wp, we next sought to address whether this would alter protein levels of the major  
130 product EBNA2 (Figure 3). Indeed, in comparison to wild-type EBV in LCLs, EBNA2 protein level is  
131 elevated by 1.4-fold (Figure 3B, red bar). Concomitantly, expression of EBNA2 in RBPmut-infected  
132 LCLs is modestly decreased to ~80% of wild-type expression level despite both Cp and Wp showing  
133 subtle increases in transcript level (Figure 3B, green bar). This may be associated with a decrease in  
134 total protein production seen in these cell lines, as illustrated by RBPJ $\kappa$  expression here (Figure 3C,  
135 green bar).

136

137 Finally, we investigated if the level of the EBNA2 protein on the EBV genome was affected by either  
138 of the mutations of the wild-type Cp sequence (Figure 4). In comparison to the wild-type Cp (Figure 4,  
139 blue bars), deletion of the Cp-CTCF binding site results in an up to 8-fold increase in EBNA2

## CTCF association regulates EBV C-promoter

140 recruitment across Cp (Figure 4B, red bars) concurrent with a similar increase in RBPJ $\kappa$  recruitment  
141 (Figure 4C, red bars), while respective levels at the LMP2a promoter (LMP2ap) remain unchanged  
142 (Figures 4E-F, red bars). Interestingly, mutation of the Cp-RBPJ $\kappa$  binding site appears to cause a  
143 decrease in EBNA2 recruitment to Cp (Figure 4B, green bars) in comparison to wild-type infection  
144 (Figure 4B, blue bars), which is consistent with a near entire ablation of RBPJ $\kappa$  enrichment with the  
145 mutated promoter (Figure 4C, green bars), while association is largely unchanged at LMP2ap (Figure  
146 4F, green bars).

147

### 148 **Discussion**

149 The control of gene expression from the EBV genome through the regulation of transcription is known  
150 to be integral to the establishment of infection of this virus but also the shifting of latency type  
151 depending on the cellular environment that the virus finds itself in. Consequently, EBV has evolved to  
152 regulate its own expression from a small number of viral promoters that can modulate the expression  
153 level of various latency-associated genes. Through the work of a number of laboratories, we know that  
154 CTCF is an important cellular factor associated with the control of EBV gene expression. Yet, it is still  
155 incompletely understood how CTCF applies this control on promoters such as Cp. Hence, we undertook  
156 to investigate how the deletion of a CTCF binding site upstream from Cp affected transcription from  
157 various EBV promoters and also whether the association of the viral transactivator EBNA2 was in any  
158 way modulated.

159

160 We found that deletion of the CTCF binding site upstream of Cp led to up-regulation of transcription  
161 from Cp (Figure 2), as was reported in the original work with these cell lines (Evans, 1996) and for a  
162 Cp-CTCF binding site deletion mutant EBV used elsewhere (Chau, 2006). In contrast, though, the  
163 modest decrease in Cp activation that the previous authors saw with RBPJ $\kappa$  binding site mutation was  
164 not replicated here, where a subtle increase in transcription from both Cp and Wp was seen in RBPJmut.  
165 This difference may be due to the reduced number of cell lines available for use here, although it is  
166 important to note that our transcript data here are fully quantitative in comparison previous semi-  
167 quantitative PCRs (Evans, 1996).

## CTCF association regulates EBV C-promoter

168

169 Despite the decrease in the level of Wp driven transcript – which can also code for EBNA2 – associated  
170 with Cp-CTCF binding site deletion, the cumulative outcome was an increase in EBNA2 protein  
171 expression (Figure 3). As previously reported (Evans, 1996), the fold changes in transcript and protein  
172 level within cells lines do not fully correlate, adding to speculation that expression level of EBV proteins  
173 such as EBNA2 are very likely to be controlled at a post-transcriptional stage, at least in part due to the  
174 stability of both the coding transcripts and also the protein itself. The small decrease seen in EBNA2  
175 protein level with mutation of the RBPJ $\kappa$  binding site in Cp, however statistically significant, appears  
176 unlikely to be functional as recruitment to the LMP2a promoter (Figure 4D, green bars) is consistent  
177 with enrichment at the wild-type promoter (Figure 4D, blue bars).

178

179 In order to investigate the mechanism by which loss of the CTCF binding site up-regulates Cp, we  
180 undertook ChIP assays to determine the association of EBNA2 with the EBV genome, as this viral  
181 transcription factor is known to transactivate Cp (Figure 4). Enrichment of EBNA2 at the wild-type Cp  
182 (Figure 4A, blue bars) was consistent to ChIP profiles across the promoter generated elsewhere (Bark-  
183 Jones, 2006) and was substantially enhanced by deletion of the CTCF binding site (Figure 4B, red bars).  
184 This increased enrichment was accompanied by an increase in RBPJ $\kappa$  association with Cp (Figure 4C,  
185 red bars), while mutation of the Cp-RBPJ $\kappa$  binding site led to modestly reduced levels of both RBPJ $\kappa$   
186 and EBNA2 proteins (Figure 4B-C, green bars). This is consistent with the long-term understanding of  
187 EBNA2 recruitment to both viral and cellular genes through the RBPJ $\kappa$  protein and its binding sites  
188 (Ling, 1993). More recently, it has also been shown that EBNA2 itself is able to drive changes in  
189 localisation of RBPJ $\kappa$ , as well as the Early B-cell Factor 1 (EBF1) protein that also has a binding site  
190 within Cp (Lu, 2016). Thus, the parallel increased association of both EBNA2 and RBPJ $\kappa$  at the CTCF-  
191 deleted Cp is not surprising. Little change of either EBNA2 or RBPJ $\kappa$  association at the LMP2a  
192 promoter (LMP2ap), which itself has two RBPJ $\kappa$  binding sites and an EBF1 binding site, is consistent  
193 with only subtle changes to the total cellular level of those proteins in each LCL type used here and  
194 corroborates that the high enrichment at Cp- $\Delta$ CTCFbs is due to specific recruitment (Figure 2).

195

## CTCF association regulates EBV C-promoter

196 Although the mechanism of increased Cp activity with CTCF binding site deletion appears to involve  
197 an increased association of EBNA2 with the promoter, the full explanation for this phenomenon remains  
198 enigmatic. As EBNA2 expression can be driven from Cp, it becomes something of a ‘chicken and egg’  
199 situation to unravel how the two are associated and whether some form of positive feedback loop exists.  
200 Despite the lack of ChIP data to confirm that the Cp deletion resulted in the loss of CTCF binding  
201 directly upstream of Cp- $\Delta$ CTCFbs, the ability of EBNA2 to associate with this location appears to be  
202 the more likely reason for concurrent up-regulation of Cp, with Cp enrichment (~8-fold) substantially  
203 greater than the rise in EBNA2 protein level (~1.4-fold - Figure 3A). Of course, we cannot preclude  
204 that deletion of the GRE region encompassing the CTCF binding site has in some way affected the  
205 association of other repressive factors between OriP and Cp, or indeed allowed the recruitment of  
206 activators other than EBNA2. It is unlikely that the loss of the GRE sites specifically has led to some  
207 form of higher Cp activation, since they appear to only have the ability to stimulate expression (Sinclair,  
208 1994). Indeed, the finding that another Cp-CTCF binding deletion virus (Chau, 2006: coordinates  
209 10393-10590) with only partial overlapping excised sequence to the virus used here (Evans, 1996:  
210 coordinates 10221-10482) displays the same up-regulation of Cp activity support our belief that this  
211 effect is a direct result of CTCF loss between OriP and Cp.

212

213 The ability of EBNA2 to increase association with this locus after Cp-CTCF binding site deletion may  
214 well be due to changes in the three-dimensional (3D) organisation of the EBV genome. Studies of other  
215 CTCF binding site mutants have shown that usual looping to the OriP enhancer driven by CTCF  
216 molecules can be disrupted and results in changes to EBV promoter transcription. Abrogation of Qp  
217 looping to OriP by deletion of the Qp-CTCF binding site – Qp is active in type I latency – caused up-  
218 regulation of Cp transcription, but deletion of the Cp-CTCF binding site led to a decrease in looping  
219 from oriP to both promoters (Tempera, 2011). It is tempting to hypothesise that this more accessible  
220 3D structure may allow higher levels of recruitment of EBNA2, along with RBPJk, to Cp under these  
221 circumstances, which subsequently leads to increased Cp transcription. Chromosome conformation  
222 capture (3C) assays would first be necessary to confirm that looping between OriP-Cp has indeed been  
223 modulated in this fashion prior to further studies. Additionally, similar analyses of a Cp-CTCF binding



## CTCF association regulates EBV C-promoter

224 site deletion in an EBNA2 knockout EBV background or an EBNA2-depletion model might allow  
225 further investigation of whether higher EBNA2 recruitment is fully necessary to drive increases to Cp  
226 transcript level or whether removal of the CTCF binding site alone is enough to conserve this phenotype.

227

228 Several studies have shown that depletion of CTCF protein using short interfering RNA (siRNA)  
229 methods leads to increased Cp activity in wild-type EBV-infected 293 cells, whereas Qp transcript  
230 levels decrease (Tempera, 2011). In fact, CTCF depletion in type I latency Mutu cells caused increased  
231 EBNA2 expression, while conversely CTCF over-expression led to a decrease of EBNA2 protein in  
232 type III latency Raji cells (Chau, 2006). Indeed, greater total levels of CTCF protein are usually found  
233 in type I latency cells than in type III latency cells, supporting a model that increased binding of CTCF  
234 to the EBV genome correlates with decreases in transcription from Cp (Chau, 2006; Hughes, 2012).  
235 Therefore, it appears that CTCF may be involved in the regulation of latency type during EBV infection.  
236 It has been reported that another mutant EBV genome without the Cp-CTCF binding site was able to  
237 shift to latency type I, despite showing continued expression from Cp in comparison to the wild-type  
238 virus, in a B-cell superinfection model (Hughes, 2012). However, total cellular CTCF levels were not  
239 analysed here. Thus, it appears that, although CTCF contributes to the establishment and restriction of  
240 latency type, it may not be essential for maintenance of latency type.

241

242 Nevertheless, the data presented here support previous observations that binding of CTCF directly  
243 upstream of Cp is important for the regulation of transcription from this and other EBV promoters.  
244 Deletion of the Cp-CTCF binding site leads to a higher level of Cp transcripts and EBNA2 protein,  
245 likely through increased transactivation via higher recruitment of EBNA2, which itself becomes  
246 possible due to a more open and accessible 3D chromatin structure through the removal of the large  
247 zinc-finger protein and abrogation of normal OriP-Cp looping. Taken together, we confirm the  
248 importance of CTCF as a genomic architectural organising protein in the regulation of viral transcription  
249 and gene expression during the establishment and, to some extent, maintenance of latency type during  
250 EBV infection.

251

## 252 **Materials & Methods**

### 253 **Cell lines**

254 Established lymphoblastoid cell lines (LCLs) used in this study were first described elsewhere (Evans,  
255 1996) and were a kind gift from Prof. Paul Farrell (Imperial College London). In short, wild-type EBV-  
256 infected LCLs (WT; BC36, BC37, SKS4.2, SKS4.3) acted as controls for Cp-CTCF binding site deleted  
257 EBV-infected LCLs ( $\Delta$ CTCFbs; GR2, GR104, GR112) and Cp-RBPJ $\kappa$  binding site mutated EBV-  
258 infected LCLs (RBPmut; E3, E108, E139). All cells were grown in RPMI supplemented with 10% FCS,  
259 penicillin and streptomycin (Sigma) and were split 1:3 twice a week to maintain growth in culture.

260

### 261 **Quantification of EBV transcript level**

262 RNA was extracted from approximately  $1 \times 10^6$  cells using the RNeasy mini kit (Qiagen) following the  
263 manufacturer's instructions. For all samples, 1  $\mu$ g of each RNA sample was reverse-transcribed to cDNA  
264 using SuperScript III First-Strand Synthesis Supermix (Invitrogen). Around 1% of the product was then  
265 used per qPCR reaction, which was performed on an ABI 7900HT real-time PCR machine using  
266 previously published EBV promoter-specific primers/probe combinations and cellular controls (Bell,  
267 2006) with the Taqman low ROX Probe 2X MasterMix (Eurogentec). Dissociation curve analysis was  
268 performed during each run to confirm absence of non-specific products. Data are representative of three  
269 individual experiments and averaging of biological replicates.

270

### 271 **SDS-PAGE and Western blotting**

272 In short, protein extracts were resolved by sodium dodecyl sulphate–polyacrylamide gel electrophoresis  
273 (SDS–PAGE) and transferred to nitrocellulose membranes before Western blot analysis was performed  
274 using an ECL kit (Amersham) for visualization of protein levels, all as described previously (Anderton,  
275 2007). Protein extractions were performed at least twice and representative results are shown. Primary  
276 antibodies used were: monoclonal antibodies against EBNA2 (clone PE2; DAKO), RBPJ $\kappa$  (ab25949;  
277 Abcam) and  $\gamma$ -Tubulin (T6557; Sigma). Semi-quantitative analysis of protein levels was carried out  
278 using Image J software and comparative densitometry to  $\gamma$ -Tubulin loading levels.

279

280 **Chromatin Immunoprecipitation**

281 Chromatin immunoprecipitation (ChIP) assays were carried out using a ChIP Assay Kit (17–295;  
282 Millipore) according to the manufacturer’s instructions, as described previously (Paschos, 2009).  
283 Chromatin was sheared to a range of 200–800bp in length from  $1 \times 10^6$  cells per ChIP in 200 ml of lysis  
284 buffer using a Bioruptor sonicator (UCD-200; Diagenode) on a high setting for a total of 12 min (30  
285 sec ‘on’/30 sec ‘off’ intermittent sonication). Chromatin was immunoprecipitated using either EBNA2  
286 (ab90543; Abcam) or RBPJk (ab25949; Abcam) specific antibodies, with normal mouse or rabbit IgG  
287 serum as negative controls, respectively (12-371, 12-370; Millipore). Isolated DNA was assayed by  
288 qPCR using the Platinum SYBR Green qPCR SuperMix (11733; Invitrogen) on an ABI 7900HT real-  
289 time PCR machine. Using standard curves, 1% of input was compared to the immunoprecipitated DNA  
290 sample and the values from the IgG negative control were subtracted as background. The data are  
291 representative of two independent experiments with averaging of all biological replicates. Sequences of  
292 the primers used for ChIP-qPCR are listed in Table 1.

293

294 **Conflict of interest statement**

295 The corresponding author declares that there are no competing interests.

296

297 **Author contributions**

298 MJA and IJG conceived and designed the study. IJG carried out all data analysis, interpretation and  
299 wrote the manuscript.

300

301 **Acknowledgements**

302 This manuscript was written *in memoriam* of Prof. Martin J Allday and also towards the memory of our  
303 colleague and friend Dr Mark Bain. Thanks to Dr Rob E. White for helpful discussions and critical  
304 review of the manuscript. This project was funded by project grant 049293 awarded to MJA/IJG by the  
305 Wellcome Trust.

306

307

308 **References**

309 Altmann M, Pich D, Ruiss R, Wang J, Sugden B, Hammerschmidt W (2006) Transcriptional  
310 activation by EBV nuclear antigen 1 is essential for the expression of EBV's transforming genes. *Proc*  
311 *Natl Acad Sci USA* 103:14188–14193.

312 Anderton E, Yee J, Smith P, Crook T, White RE, Allday MJ. (2008) Two Epstein-Barr virus  
313 (EBV) oncoproteins cooperate to repress expression of the proapoptotic tumour-suppressor Bim: clues  
314 to the pathogenesis of Burkitt's lymphoma. *Oncogene* 27:421–433.

315 Bark-Jones SJ, Webb HM & West MJ (2006) EBV EBNA 2 stimulates CDK9-dependent  
316 transcription and RNA polymerase II phosphorylation on serine 5. *Oncogene* 25:1775–1785.

317 Bell AI, Groves K, Kelly GL, Croom-Carter D, Hui E, Chan ATC, Rickinson AB (2006)  
318 Analysis of Epstein-Barr virus latent gene expression in endemic Burkitt's lymphoma and  
319 nasopharyngeal carcinoma tumour cells by using quantitative real-time PCR assays. *J Gen Virol*  
320 87:2885–2890.

321 Chau CM, Lieberman PM (2004) Dynamic chromatin boundaries delineate a latency control  
322 region of Epstein-Barr virus. *J Virol* 78:12308-12319.

323 Chau CM, Zhang XY, McMahon SB, Lieberman PM (2006) Regulation of Epstein-Barr virus  
324 latency type by the chromatin boundary factor CTCF. *J Virol* 80:5723-5732.

325 Evans TJ, Farrell PJ, Swaminathan S (1996) Molecular genetic analysis of Epstein-Barr virus  
326 Cp promoter function. *J Virol* 70:1695-705.

327 Farrell PJ (2018) Epstein-Barr Virus and Cancer. *Annu Rev Pathol* doi:10.1146

328 Gross H, Barth S, Palermo RD, Mamiani A, Hennard C, Zimmer-Strobl U, West MJ, Kremmer  
329 E, Grässer FA (2010) Asymmetric Arginine dimethylation of Epstein-Barr virus nuclear antigen 2  
330 promotes DNA targeting. *Virology* 397:299-310.

331 Hammerschmidt W (2015) The Epigenetic Life Cycle of Epstein-Barr Virus. *Curr Top*  
332 *Microbiol Immunol* 390:103-17.

333 Holdorf MM, Cooper SB, Yamamoto KR, Miranda JJ (2011) Occupancy of chromatin  
334 organizers in the Epstein-Barr virus genome. *Virology* 415:1-5.

CTCF association regulates EBV C-promoter

- 335 Hughes DJ, Marendy EM, Dickerson CA, Yetming KD, Sample CE, Sample JT (2012)  
336 Contributions of CTCF and DNA methyltransferases DNMT1 and DNMT3B to Epstein-Barr virus  
337 restricted latency. *J Virol* 86:1034-45.
- 338 Ling PD, Rawlins DR, Hayward SD (1993) The Epstein-Barr virus immortalizing protein  
339 EBNA-2 is targeted to DNA by a cellular enhancer binding protein. *Proc Natl Acad Sci USA* 90:9237–  
340 9241.
- 341 Lu F, Chen HS, Kossenkov AV, DeWispeleare K, Won KJ, Lieberman PM (2016) EBNA2  
342 Drives Formation of New Chromosome Binding Sites and Target Genes for B-Cell Master Regulatory  
343 Transcription Factors RBPJK and EBF1. *PLoS Pathog* 12:e1005339.
- 344 Lupey-Green LN, Caruso LB, Madzo J, Martin KA, Tan Y, Hulse M, Tempera I (2018) PARP1  
345 Stabilizes CTCF Binding and Chromatin Structure To Maintain Epstein-Barr Virus Latency Type. *J*  
346 *Virol* 92:e00755-18.
- 347 Palermo RD, Webb HM, Gunnell A, West MJ (2008) Regulation of transcription by the  
348 Epstein-Barr virus nuclear antigen EBNA 2. *Biochem Soc Trans.* 36:625-8.
- 349 Paschos K, Smith P, Anderton E, Middeldorp JM, White RE, Allday MJ (2009) Epstein-barr  
350 virus latency in B-cells leads to epigenetic repression and CpG methylation of the tumour suppressor  
351 gene Bim. *PLoS Pathog* 5:e1000492.
- 352 Pentland I, Parish L (2015) Targeting CTCF to Control Virus Gene Expression: A Common  
353 Theme amongst Diverse DNA Viruses. *Viruses* 7:3574-85.
- 354 Plummer M, de Martel C, Vignat J, Ferlay J, Bray F, Franceschi S (2016) Global burden of  
355 cancers attributable to infections in 2012: a synthetic analysis. *Lancet Glob Health* 4:e609–16.
- 356 Puglielli MT, Woisetschlaeger M, Speck SH (1996) oriP is essential for EBNA gene promoter  
357 activity in Epstein-Barr virus-immortalized lymphoblastoid cell lines. *J Virol* 70:5758–5768.
- 358 Reisman D, Sugden B (1986) trans activation of an Epstein-Barr viral transcriptional enhancer  
359 by the Epstein-Barr viral nuclear antigen 1. *Mol Cell Biol* 5:3838–3846.
- 360 Rowe M, Rowe DT, Gregory CD, Young LS, Farrell PJ, Rupani H, Rickinson AB (1987)  
361 Differences in B-cell growth phenotype reflect novel patterns of Epstein-Barr virus latent gene  
362 expression in Burkitt's lymphoma cells. *EMBO J* 6:2743–51.

CTCF association regulates EBV C-promoter

363 Sinclair AJ, Jacquemin MG, Brooks L, Shanahan F, Brimmell M, Rowe M, Farrell PJ (1994)  
364 Reduced signal transduction through glucocorticoid receptor in Burkitt's lymphoma cell lines. *Virology*  
365 199:339–353.

366 Tempera I, Klichinsky M, Lieberman PM (2011) EBV latency types adopt alternative  
367 chromatin conformations. *PLoS Pathog* 7:e1002180.

368 Tempera I, Lieberman PM (2014) Epigenetic regulation of EBV persistence and oncogenesis.  
369 *Semin Cancer Biol* 26:22-9.

370 Tempera I, Wiedmer A, Dheekollu J, Lieberman PM (2010) CTCF prevents the epigenetic drift  
371 of EBV latency promoter Qp. *PLoS Pathog* 6:e1001048.

372 Westhoff Smith D, Sugden B (2013) Potential cellular functions of Epstein–Barr nuclear  
373 antigen 1 (EBNA1) of Epstein–Barr virus. *Viruses* 5:226–40.

374 White RE, Groves IJ, Turro E, Yee J, Kremmer E, Allday MJ (2010) Extensive co-operation  
375 between the Epstein-Barr virus EBNA3 proteins in the manipulation of host gene expression and  
376 epigenetic chromatin modification. *PLoS One* 5:e13979.

377 Woisetschlaeger M, Jin XW, Yandava CN, Furmanski LA, Strominger JL, Speck SH (1991)  
378 Role for the Epstein-Barr virus nuclear antigen 2 in viral promoter switching during initial stages of  
379 infection. *Proc Natl Acad Sci USA* 88:3942–3946.

380 Zhao B, Zou J, Wang H, Johannsen E, Peng CW, Quackenbush J, Mar JC, Morton CC,  
381 Freedman ML, Blacklow SC, Aster JC, Bernstein BE, Kieff E (2011) Epstein-Barr virus exploits  
382 intrinsic B-lymphocyte transcription programs to achieve immortal cell growth. *Proc Natl Acad Sci*  
383 *USA* 108:14902-7.

384

385

386

387

388

389

390

391 **Table 1. Primers used in this study for ChIP-qPCR.**

| Target position | Design location  | Direction of primer | Primer sequence             | Coordinates relative to TSS |
|-----------------|------------------|---------------------|-----------------------------|-----------------------------|
| Cp-3            | In-house         | Fwd                 | AGGCCATTGACGCAAGTTTT        | -979                        |
|                 |                  | Rev                 | GGCTCCTAAGATGGACCTAGAACA    | -894                        |
| Cp-2            | Bark-Jones, 2006 | Fwd                 | CCTAGGCCAGCCAGAGATAAT       | -430                        |
|                 |                  | Rev                 | AGATAGCACTCGACGCACTG        | -336                        |
| Cp-1            | Bark-Jones, 2006 | Fwd                 | ACCTTAGAGGTGGAGCAACG        | -208                        |
|                 |                  | Rev                 | GGCGAATTAAGTGGAGCTTGC       | -94                         |
| Cp+1            | Bark-Jones, 2006 | Fwd                 | CATCGCAGGGTCTTACCAT         | 50                          |
|                 |                  | Rev                 | CCTCAGGAGGCCCTTAGACT        | 168                         |
| Cp+2            | Bark-Jones, 2006 | Fwd                 | GAAGAAACAGCCTCCTGCAC        | 307                         |
|                 |                  | Rev                 | TTCAGTGCCCAGATTCATGT        | 407                         |
| LMP2ap-1        | Gross, 2010      | Fwd                 | GATAGCCTCGCGACTCGTGGA       | -272                        |
|                 |                  | Rev                 | AATCTTCACACACTGCTGCTG       | -209                        |
| LMP2ap+1        | Gross, 2010      | Fwd                 | CCAATATCCATCTGCTTCTGG       | 148                         |
|                 |                  | Rev                 | GGCTCTTCATTAGATTCAGTTC      | 228                         |
| LMP2ap+2        | Gross, 2010      | Fwd                 | CTCATCTCAACACATATATGAAGAAGC | 379                         |
|                 |                  | Rev                 | TTGATGTGACTTGTGATGCAAT      | 470                         |

392

## EBV C promoter (Cp)

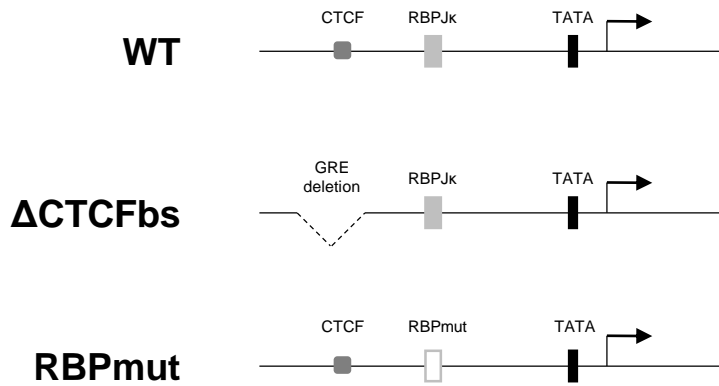

**Figure 1. Schematic representation of modified EBV C-promoter (Cp) sequence elements in LCLs.** Cell lines are described as wild type (WT), Cp-CTCF binding site deletion ( $\Delta$ CTCFbs) and Cp-RBPJk binding site mutant (RBPmut) infected LCLs. 'GRE deletion' refers to location of the glucocorticoid response element region deletion that overlaps with the Cp-CTCF binding site.



**A**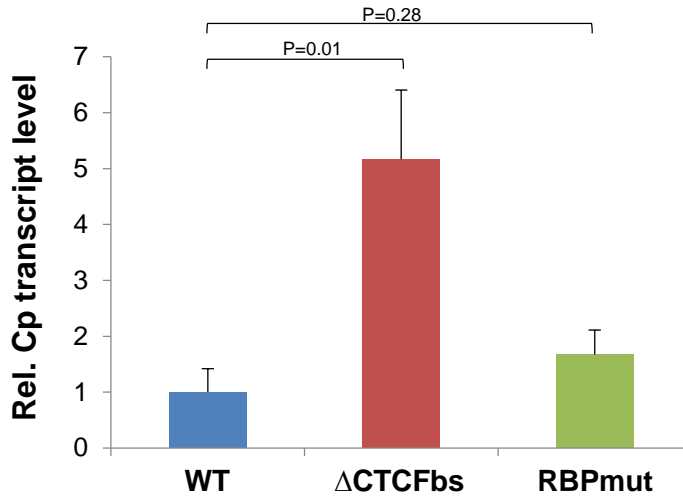**B**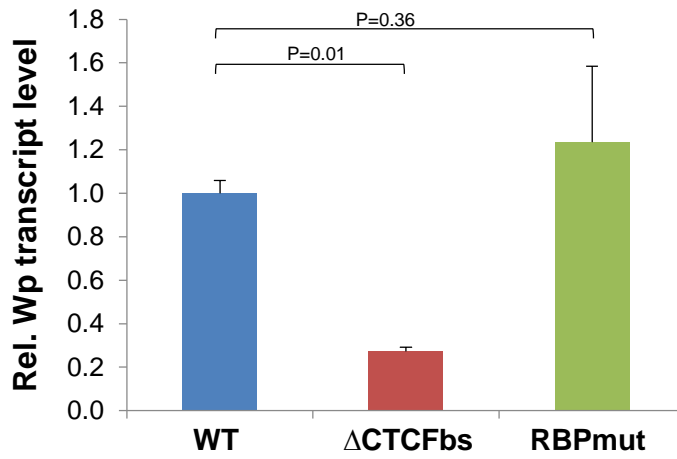**C**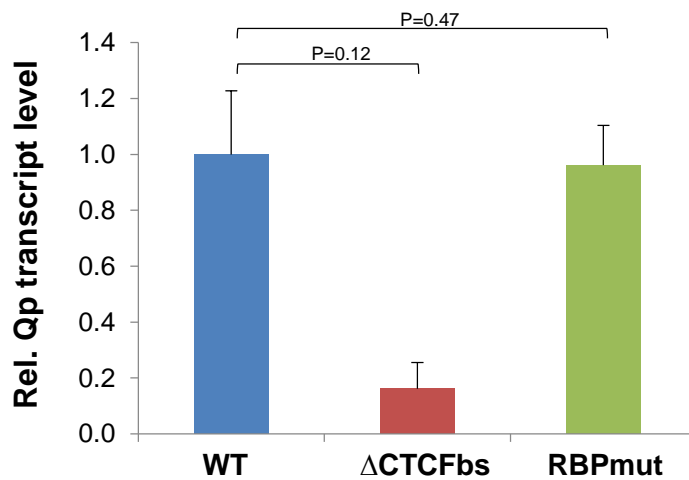

**Figure 2. Deletion of EBV Cp-CTCF binding site leads to increased Cp transcript level in LCLs.** Quantitative PCR (qPCR) analysis of EBV promoter transcript levels from (A) Cp, (B) Wp and (C) Qp, in wild-type (WT, blue bars), Cp-CTCF binding site deletion ( $\Delta$ CTCFbs, red bars) and Cp-RBPJk binding site mutant (RBPmut, green bars) virus infected LCLs. Values are means (+1SD) of at least three biological replicates and two technical replicates, and relative to wild-type controls. P-value determined by Student's T-test.

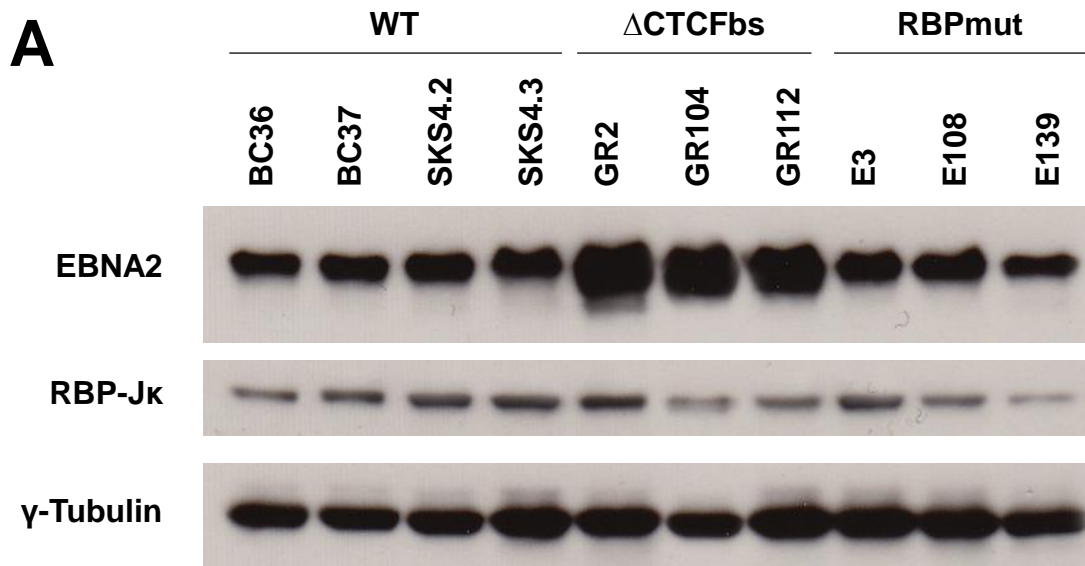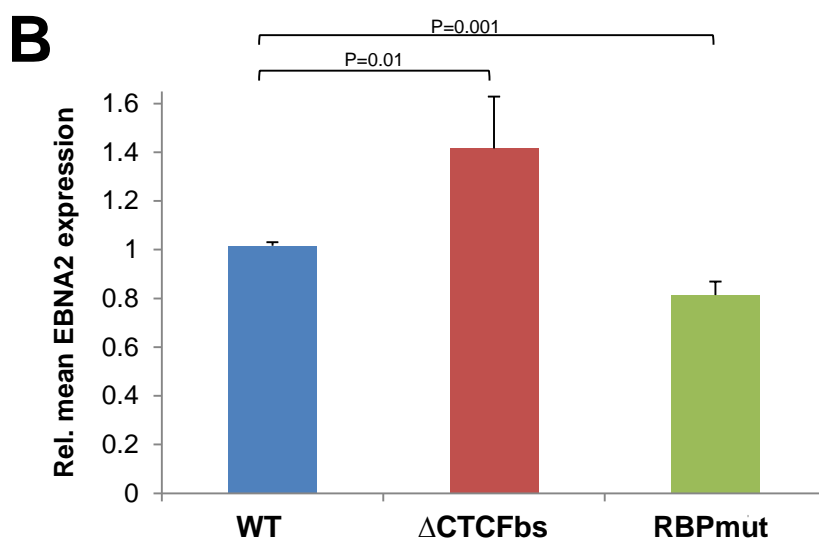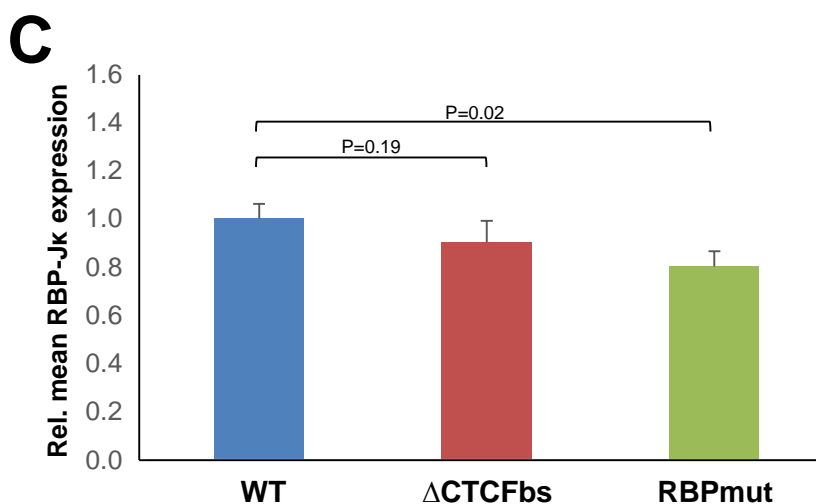

**Figure 3. Deletion of EBV Cp-CTCF binding site leads to increased EBNA2 protein level in LCLs.** (A) Western blot analysis of EBNA2 and RBPJk protein levels, with  $\gamma$ -Tubulin as a loading control, in wild-type (WT), Cp-CTCF binding site deletion ( $\Delta$ CTCFbs) and Cp-RBPJk binding site mutant (RBPmut) virus infected LCLs. (Representative images shown.) Semi-quantitative Image J analysis of (B) EBNA2 and (C) RBPJk protein levels from WT (blue bars),  $\Delta$ CTCFbs (red bars) and RBPmut (green bars) virus infected LCLs. Values are means (+1SD) of the biological replicates presented, from two technical replicates, and relative to wild-type controls. P-value determined by Student's T-test.

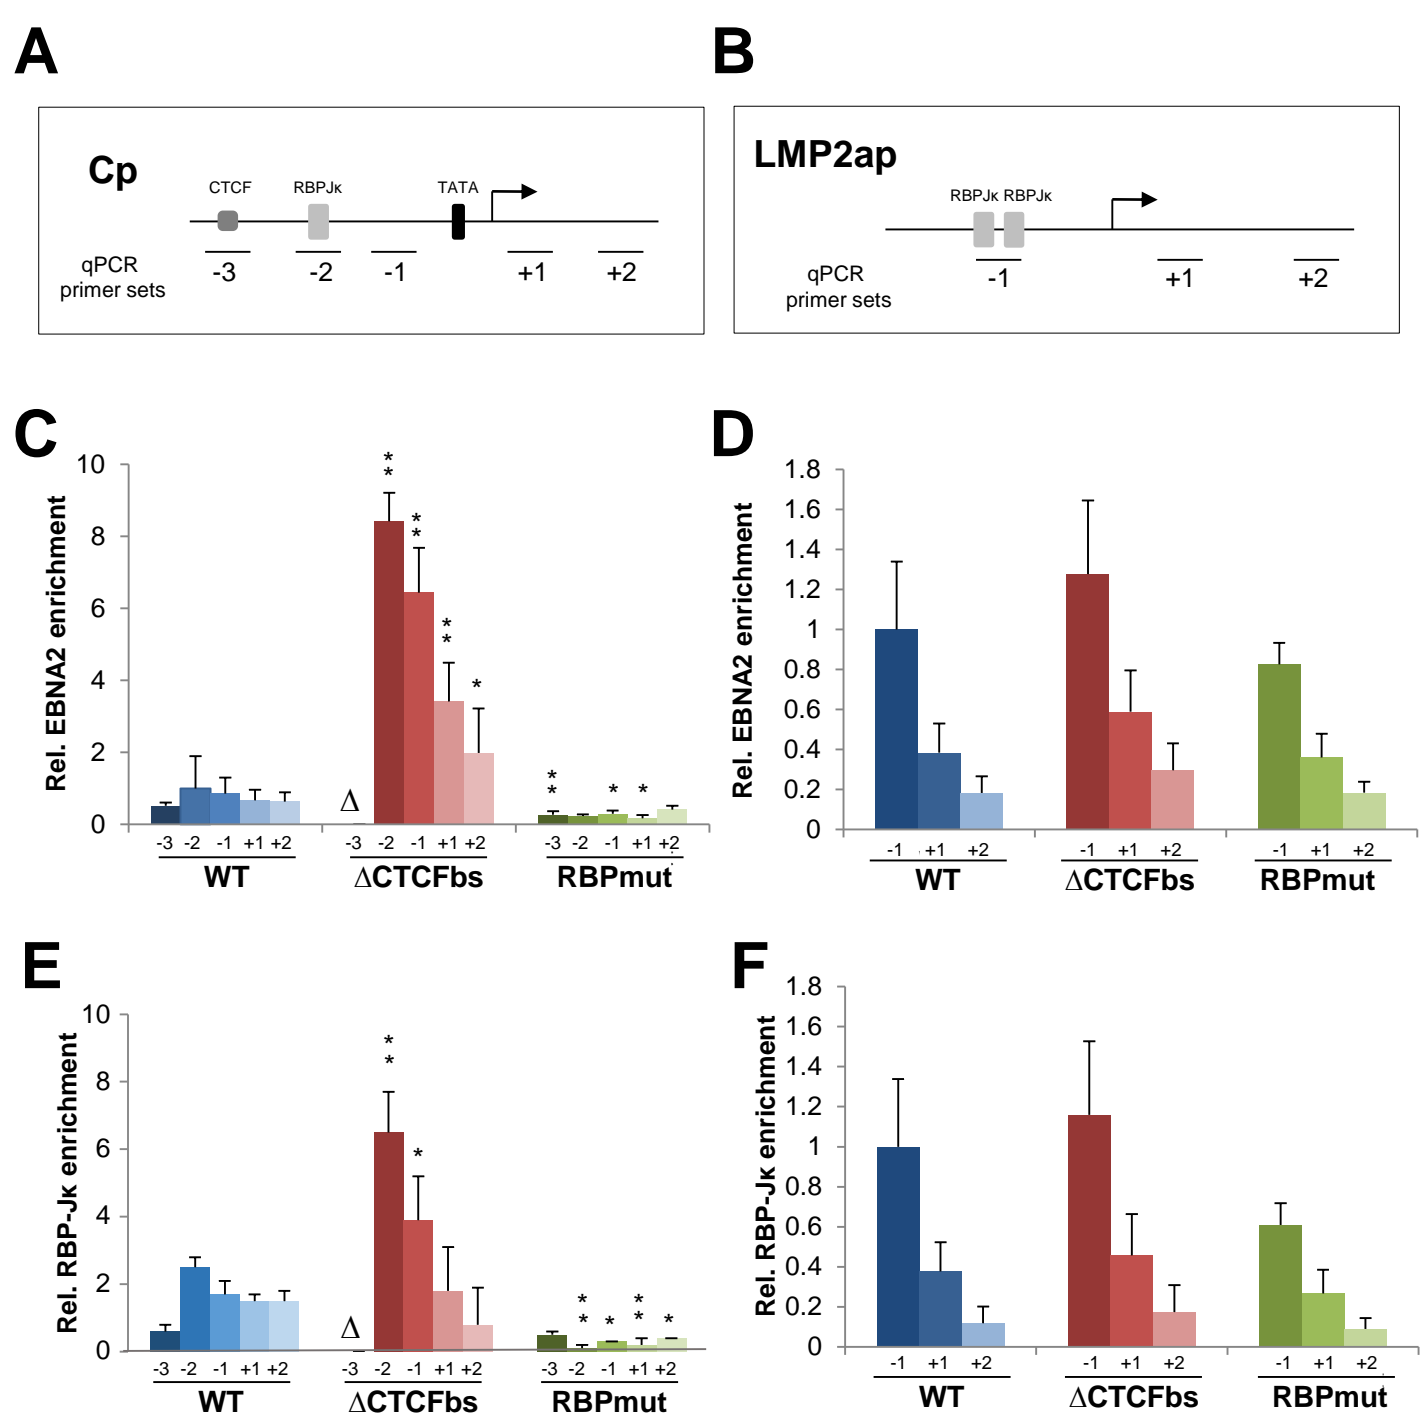

**Figure 4. Deletion of EBV Cp-CTCF binding site leads to increased EBNA2 and RBPJk recruitment across Cp in LCLs.** Chromatin immunoprecipitation (ChIP) analysis of enrichment at (A) the C-promoter (Cp, left column) and (B) LMP2a promoter (LMP2ap, right column) of (C-D) EBNA2 and (E-F) RBPJk in wild type (WT, blue bars), Cp-CTCF binding site deletion ( $\Delta$ CTCFbs, red bars) and Cp-RBPJk binding site mutant (RBPmut, green bars) virus infected LCLs. Schematic representations of promoters (top row) show the location of ChIP-qPCR assays relative to the transcriptional start site (angled arrow). Values are means (+1SD) of at least three biological replicates and two technical replicates, and relative to wild-type controls. P-value determined by Student's T-test (\* $P < 0.05$ ; \*\* $P < 0.01$ ).  $\Delta$  = deletion of this site in  $\Delta$ CTCFbs LCLs.
